# Supplementary material for: Genetic Susceptibility to Periodontal Disease in Down Syndrome: A Case-Control Study
Source: MDPI journal article supplement (doi:10.3390/ijms22126274), 2021-06-10
Supplement: s1 [file s1]

**Table 1.** Patient sample characteristics (age, sex and systemic conditions).

|                      |                                  | Full Sample | Extreme Phenotype<br>(Included in the Study) |                                            | Gingivitis<br>(Excluded<br>from the<br>Study) |
|----------------------|----------------------------------|-------------|----------------------------------------------|--------------------------------------------|-----------------------------------------------|
|                      |                                  |             | Cases with Perio-<br>dontitis                | Controls with<br>Healthy Perio-<br>dontium |                                               |
| Age<br>(years)       | Mean                             | 24.9        | 27.2                                         | 26.8                                       | 21.4                                          |
| Sex                  | Female, <i>n</i> (%)             | 64 (46)     | 18 (34.6)                                    | 17 (47.2)                                  | 29 (56.9)                                     |
|                      | Male, <i>n</i> (%)               | 75 (54)     | 34 (65.4)                                    | 19 (52.8)                                  | 22 (43.1)                                     |
| Systemic<br>diseases | All conditions, <i>n</i> (%)     | 24 (17.3)   | 10 (19.2)                                    | 11 (30.5)                                  | 3 (5.9)                                       |
|                      | Heart disease, <i>n</i> (%)      | 9 (6.5)     | 5 (9.6)                                      | 1 (2.8)                                    | 3 (5.9)                                       |
|                      | Thyroid disease, <i>n</i> (%)    | 19 (13.7)   | 2 (3.8)                                      | 10 (27.8)                                  | 7 (13.7)                                      |
|                      | Thyroid medication, <i>n</i> (%) | 19 (13.7)   | 2 (3.8)                                      | 10 (27.8)                                  | 7 (13.7)                                      |
|                      | Other conditions, <i>n</i> (%)   | 8 (5.8)     | 3 (5.8)                                      | 3 (8.3)                                    | 2 (3.9)                                       |

**Table 2.** Periodontal clinical outcome variables for the whole sample (mean±standard deviation).

|     | Full Sample | Extreme Phenotype (Included in the Study) |                                       | Gingivitis (Excluded<br>from the Study) |
|-----|-------------|-------------------------------------------|---------------------------------------|-----------------------------------------|
|     |             | Cases with Periodontitis                  | Controls with Healthy<br>Periodontium |                                         |
| PD  | 2.39 ± 0.47 | 2.72 ± 0.47                               | 2.07 ± 0.11                           | 2.13 ± 0.19                             |
| REC | 0.08 ± 0.25 | 0.14 ± 0.35                               | 0.02 ± 0.06                           | 0.02 ± 0.04                             |
| PII | 56.5 ± 31.5 | 71.2 ± 25.8                               | 41.8 ± 30.3                           | 58.3 ± 26.7                             |
| BOP | 19.9 ± 17.8 | 32.2 ± 16.7                               | 7.7 ± 7.7                             | 25.3 ± 9.2                              |

Abbreviations: PD, probing depth; REC, gingival recession; PII, plaque index; BOP, bleeding on probing
